# Supplementary material for: A novel microbial agent reduces soil paclobutrazol residue, enhances enzyme activities and increases Ophiopogon japonicus production
Source: PeerJ. 2025 Feb 20;13:e19008. doi: 10.7717/peerj.19008 (PMC11847490; doi:10.7717/peerj.19008)
Supplement: Supplemental Information 1 — Note: MYSH represents Micrococcus yunnanensis strain HY001. [file peerj-13-19008-s001.xlsx]

## Sheet: Sheet1
Raw data for soil paclobutrazol residue
Group	Experimental district 1 (mg/kg)	Experimental district 2 (mg/kg)	Experimental district 3 (mg/kg)
Before cultivation	0.5493	0.5404	0.5538
Control group	0.2655	0.2541	0.2903
Paclobutrazol group	2.5298	2.683	2.4072
MYSH group	0.0674	0.0728	0.0608
Paclobutrazol & MYSH group	1.1688	1.373	1.2682

## Sheet: Sheet2
Raw data for soil enzyme activities
Group	soil sucrase activity (mg/(g·24h))			soil urease activity (mg/(g·24h))			soil alkaline phosphatase activity (mg/(g·24h))
	Experimental district 1	Experimental district 2	Experimental district 3	Experimental district 1	Experimental district 2	Experimental district 3	Experimental district 1	Experimental district 2	Experimental district 3
Control group	26.1594	21.8116	19.7826	4.9168	8.3581	5.4116	0.8508	0.8155	1.043
Paclobutrazol group	51.5217	37.029	43.8406	13.5762	12.2177	15.1507	0.46	0.4279	0.3767
MYSH group	26.1594	36.8841	37.1014	17.13	19.0418	23.0004	1.4338	1.4882	1.0526
Paclobutrazol & MYSH group	53.4058	51.5217	54.6377	10.5173	13.5088	7.2335	0.8027	0.4632	0.633

## Sheet: Sheet3
Raw data for dry weight of Ophiopogon japonicus tuberous roots
Group	Experimental district 1 (g)					Experimental district 2 (g)					Experimental district 3 (g)
	replicate 1	replicate 2	replicate 3	replicate 4	replicate 5	replicate 1	replicate 2	replicate 3	replicate 4	replicate 5	replicate 1	replicate 2	replicate 3	replicate 4	replicate 5
Control group	1.93	2.3	2.82	3.15	1.3	1.05	1.93	1.71	2.21	1.69	2.29	3.27	2.01	2.35	1.82
Paclobutrazol group	3.88	3.3	3.28	3.04	3	3.2	3.04	3.3	2.17	4.74	2.66	2.62	3.9	3.33	4.17
MYSH group	2.76	3.98	3.37	6.12	3.61	3.46	4.34	4.54	4.5	5.85	4.42	3.38	4.18	3.9	3.58
Paclobutrazol & MYSH group	6.37	6.43	7.22	6.43	5.63	6.72	4.94	5.8	6.36	5.16	5.29	4.87	6.75	5.64	5.64

## Sheet: Sheet4
Raw data for fresh weight of Ophiopogon japonicus tuberous roots
Group	Experimental district 1 (g)					Experimental district 2 (g)					Experimental district 3 (g)
	replicate 1	replicate 2	replicate 3	replicate 4	replicate 5	replicate 1	replicate 2	replicate 3	replicate 4	replicate 5	replicate 1	replicate 2	replicate 3	replicate 4	replicate 5
Control group	8.29	8.71	11.89	13.94	4.99	4.28	7.36	7.35	9.19	6.85	10.41	14.04	8.3	9.52	7.84
Paclobutrazol group	15.99	14.16	15.25	13.69	13.83	14.59	13.76	14.58	10.32	20.48	11.19	11.36	17.56	13.68	17.04
MYSH group	8.98	13.29	12.66	23.19	13.79	12.12	14.68	15.72	15.2	21.11	15.74	12.78	13.6	13.46	12.93
Paclobutrazol & MYSH group	25.02	23.85	28.68	23.66	19.92	25.02	18.05	23.27	25.3	21.37	18.5	18.14	24.41	22.03	21.94
